# Supplementary material
Source: HighWire-hosted journal article supplement (https://erj.ersjournals.com/content/56/4/2001733)
Supplement: inline-supplementary-material-1 [file inline-supplementary-material-1.pdf]

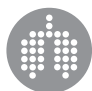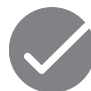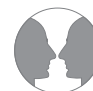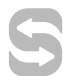

SHAREABLE PDF

# Limited role for bronchoalveolar lavage to exclude COVID-19 after negative upper respiratory tract swabs: a multicentre study

Pietro Geri<sup>1</sup>, Francesco Salton<sup>1</sup>, Lina Zuccatosta <sup>2</sup>, Mario Tamburrini <sup>3</sup>, Marco Biolo<sup>1</sup>, Annalisa Busca<sup>1</sup>, Mario Santagiuliana<sup>1</sup>, Umberto Zuccon<sup>3</sup>, Paola Confalonieri<sup>1</sup>, Barbara Ruaro<sup>1</sup>, Pierlanfranco D'Agaro<sup>4</sup>, Stefano Gasparini<sup>2</sup> and Marco Confalonieri<sup>1</sup>

**Affiliations:** <sup>1</sup>Pulmonology Unit, University Hospital of Trieste, Trieste, Italy. <sup>2</sup>Pulmonology and Bronchology Unit, Marche Polytechnic University Hospital, Ancona, Italy. <sup>3</sup>Pulmonology Unit, General Hospital of Pordenone, Pordenone, Italy. <sup>4</sup>Virology Lab, University of Trieste, Trieste, Italy.

**Correspondence:** Francesco Salton, University Hospital of Cattinara, Pulmonology, Strada di Fiume 447, Trieste, 34149, Italy. E-mail francesco.salton@gmail.com

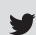

@ERSpublications

Given the strong agreement between negative upper respiratory swabs and BAL, this study suggests that BAL has a limited role in the diagnosis of COVID-19 if thoracic imaging and upper respiratory swabs are concordantly negative <https://bit.ly/3gpBC75>

**Cite this article as:** Geri P, Salton F, Zuccatosta L, *et al.* Limited role for bronchoalveolar lavage to exclude COVID-19 after negative upper respiratory tract swabs: a multicentre study. *Eur Respir J* 2020; 56: 2001733 [<https://doi.org/10.1183/13993003.01733-2020>].

This single-page version can be shared freely online.

## To the Editor:

Despite early and reliable recognition of coronavirus disease 2019 (COVID-19) being essential for disease control both at a community and hospital level, clinical picture and thoracic imaging alone are not sufficiently specific to distinguish it from other respiratory infections [1, 2]. Real-time reverse transcriptase (RT)-PCR is routinely used for qualitative and quantitative severe acute respiratory syndrome-coronavirus-2 (SARS-CoV-2) detection in specimens collected from the upper respiratory tract including nasal or nasopharyngeal swabs, but a second-line investigation like bronchoalveolar lavage (BAL) is often required to diagnose or exclude SARS-CoV-2 infection in a clinical context of possible COVID-19. A significantly lower positive rate in nasopharyngeal swabs (32%) compared to BAL samples (93%) was recently reported [3]; however, BAL was collected in only 15 out of 205 patients and in only one case BAL and nasopharyngeal swab were collected simultaneously.
